# Supplementary material
Source: PubMed Central journal article supplement (PMC5404590)
Supplement: AAC.02627-16_zac005176151s1.pdf [file AAC.02627-16_zac005176151s1.pdf]

**Table S1. Primers used in this study for *atpE* amplification**

| Species                     | Primer                         |
|-----------------------------|--------------------------------|
| <i>M. avium</i>             | P1 5'-GCGCAACACCTTCATCACC-3'   |
|                             | P2 5'-GCTGTTCCCGCCCTACATCA-3'  |
| <i>M. intracellulare</i>    | P1 5'-CCAACGCGATCTGGAAGG-3'    |
|                             | P2 5'-CCGCCTTCTTGGTGTCCG-3'    |
| <i>M. kansasii</i>          | P1 5'-TCACGTTCCCGCAATACCTT-3'  |
|                             | P2 5'-CCGCCGTATGTCATGTGGTT-3'  |
| <i>M. abscessus complex</i> | P1 5'-CCAATGCCATCTGGAAGTCGT-3' |
|                             | P2 5'-TGCCTTCAGCACCTTTTGGAT-3' |
| <i>M. fortuitum</i>         | P1 5'-TCGCCAGCATCGCTTCAC-3'    |
|                             | P2 5'-CGATGTTCCCTGGTACATCC-3'  |
